# Supplementary material for: Biobehavioral effects of Tai Chi Qigong in men with prostate cancer: Study design of a three-arm randomized clinical trial
Source: PubMed Central journal article supplement — Contemp Clin Trials Commun. 2019 Aug 21;16:100431. doi: 10.1016/j.conctc.2019.100431 (PMC6804681; doi:10.1016/j.conctc.2019.100431), 2019-08-21
Supplement: mmc2.pdf [file mmc2.pdf]

# Project HERO: **BMT** Intervention Fidelity Checklist

|                   |                  |                        |                        |
|-------------------|------------------|------------------------|------------------------|
| Week #: _____     | Session #: _____ | Date of session: _____ | Time of session: _____ |
| Instructor: _____ |                  | Observer: _____        |                        |

| Exercise/item                                                                                                                                                                                        |                                                     | Round 1 |                                 | Round 2 |                                 |  |
|------------------------------------------------------------------------------------------------------------------------------------------------------------------------------------------------------|-----------------------------------------------------|---------|---------------------------------|---------|---------------------------------|--|
|                                                                                                                                                                                                      |                                                     | ✓       | # of repetitions, seconds, etc. | ✓       | # of repetitions, seconds, etc. |  |
| <b>Informal check-in</b>                                                                                                                                                                             |                                                     |         | Notes:                          |         |                                 |  |
| <b>Warm up exercises / stretching</b>                                                                                                                                                                |                                                     |         | Notes:                          |         |                                 |  |
| <b>Resting awareness of breathing</b>                                                                                                                                                                |                                                     |         |                                 |         |                                 |  |
| <b>Opening of the Gates</b>                                                                                                                                                                          | 1. Straightening of the channels                    |         |                                 |         |                                 |  |
|                                                                                                                                                                                                      | 2. Funnel circle of the waist                       |         |                                 |         |                                 |  |
|                                                                                                                                                                                                      | 3. Circling of the head and neck                    |         |                                 |         |                                 |  |
|                                                                                                                                                                                                      | 4. Looking up and down                              |         |                                 |         |                                 |  |
|                                                                                                                                                                                                      | 5. Neck rotations                                   |         |                                 |         |                                 |  |
|                                                                                                                                                                                                      | 6. Circling of the shoulders                        |         |                                 |         |                                 |  |
|                                                                                                                                                                                                      | 7. Moving shoulders up & down, forward & back       |         |                                 |         |                                 |  |
| <b>Resting awareness of breathing</b>                                                                                                                                                                |                                                     |         |                                 |         |                                 |  |
| <b>Muscle Change Exercises</b>                                                                                                                                                                       | 8. Pressing palms forward                           |         |                                 |         |                                 |  |
|                                                                                                                                                                                                      | 9. Palm push to side                                |         |                                 |         |                                 |  |
|                                                                                                                                                                                                      | 10. Holding up the sky                              |         |                                 |         |                                 |  |
|                                                                                                                                                                                                      | 11. Pressing down the earth                         |         |                                 |         |                                 |  |
|                                                                                                                                                                                                      | 12. Drawing the bow: left & right                   |         |                                 |         |                                 |  |
|                                                                                                                                                                                                      | 13. Embracing body and rolling down                 |         |                                 |         |                                 |  |
|                                                                                                                                                                                                      | 14. Twisting of the waist                           |         |                                 |         |                                 |  |
| 15. Twisting punch                                                                                                                                                                                   |                                                     |         |                                 |         |                                 |  |
| <b>Resting awareness of breathing</b>                                                                                                                                                                |                                                     |         |                                 |         |                                 |  |
| <b>Cavity Presses</b>                                                                                                                                                                                | 16. Chest pushing & pulling                         |         |                                 |         |                                 |  |
|                                                                                                                                                                                                      | 17. Moving chest side to side                       |         |                                 |         |                                 |  |
|                                                                                                                                                                                                      | 18. Chest circles                                   |         |                                 |         |                                 |  |
| <b>Standing Exercises</b>                                                                                                                                                                            | 19. Connecting to heaven & earth                    |         |                                 |         |                                 |  |
|                                                                                                                                                                                                      | 20. Collecting energy of heaven & earth             |         |                                 |         |                                 |  |
|                                                                                                                                                                                                      | 21. Holding ball of energy                          |         |                                 |         |                                 |  |
|                                                                                                                                                                                                      | 22. Rocking chair: left & right                     |         |                                 |         |                                 |  |
|                                                                                                                                                                                                      | 23. Ruler: left & right                             |         |                                 |         |                                 |  |
|                                                                                                                                                                                                      | 24. Hands skimming on water: left & right           |         |                                 |         |                                 |  |
|                                                                                                                                                                                                      | 25. Lifting and lowering energy hands: left & right |         |                                 |         |                                 |  |
|                                                                                                                                                                                                      | 26. Pushing and pulling space: left & right         |         |                                 |         |                                 |  |
|                                                                                                                                                                                                      | 27. Cloud hands: left & right                       |         |                                 |         |                                 |  |
|                                                                                                                                                                                                      | 28. Wax on, wax off: left & right                   |         |                                 |         |                                 |  |
| <b>Resting awareness of breathing</b>                                                                                                                                                                |                                                     |         |                                 |         |                                 |  |
| <b>Explain benefits of BMT exercises, importance of participant's contribution to Project HERO, and encourage participants to continue practicing exercises on their own for duration of project</b> |                                                     |         |                                 | Notes:  |                                 |  |
| <b>I. Comments:</b>                                                                                                                                                                                  |                                                     |         |                                 |         |                                 |  |
